# Supplementary material for: Characterization of Glutathione Dithiophosphates as Long-Acting H2S Donors
Source: MDPI journal article supplement (doi:10.3390/ijms241311063), 2023-07-04
Supplement: s1 [file s1]

# Characterization of glutathione dithiophosphates as long-acting H<sub>2</sub>S donors

Rezeda A. Ishkaeva <sup>1,2</sup>, Nail N. Khaertdinov <sup>1</sup>, Aleksey V. Yakovlev <sup>1</sup>, Marina V. Esmeteva <sup>1,2</sup>, Diana V. Salakhieva <sup>1,2</sup>, Ilyas S. Nizamov <sup>3,4</sup>, Guzel F. Sitdikova <sup>1,\*</sup>, and Timur I. Abdullin <sup>1,2</sup>

<sup>1</sup> Institute of Fundamental Medicine and Biology, Kazan (Volga Region) Federal University, 18 Kremlyovskaya St., 420008 Kazan, Russia

<sup>2</sup> Scientific and Educational Center of Pharmaceutics, Kazan (Volga Region) Federal University, 18 Kremlyovskaya St., 420008 Kazan, Russia

<sup>3</sup> Alexander Butlerov Institute of Chemistry, Kazan (Volga Region) Federal University, 420008 Kazan, Russia

<sup>4</sup> Arbuzov Institute of Organic and Physical Chemistry, FRC Kazan Scientific Center of RAS, 8 Arbuzov St., 420088 Kazan, Russia

\* Correspondence: guzel.sitdikova@kpfu.ru; Tel.: +7-(843)-206-52-34

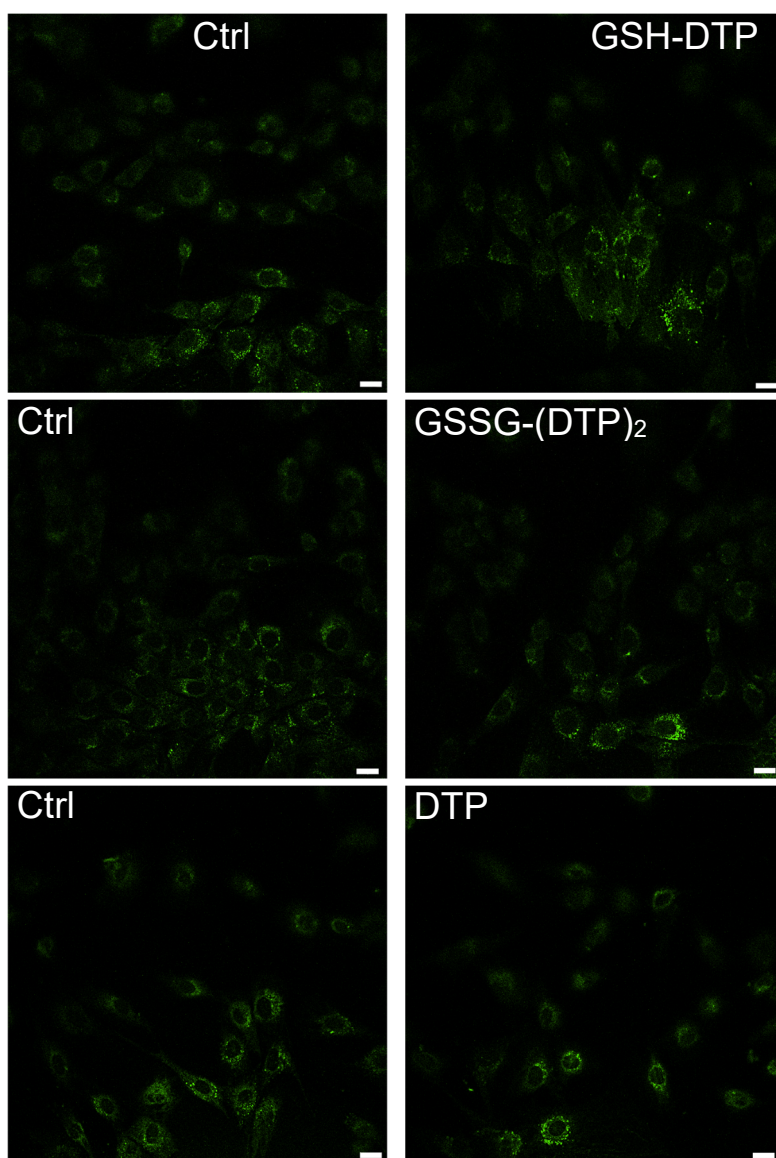

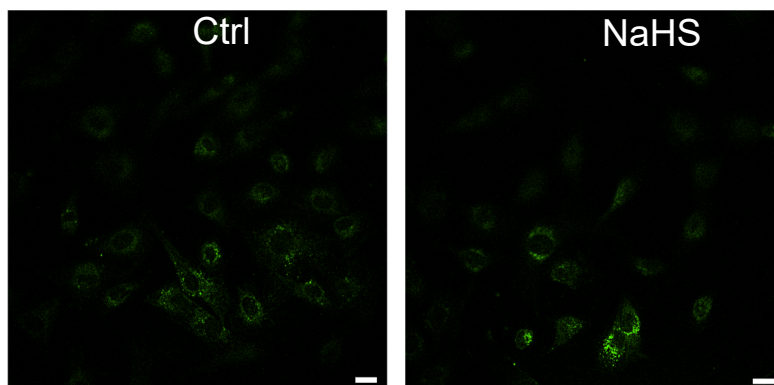

**Figure S1.** Effect of glutathione dithiophosphates, DTP and NaHS on H<sub>2</sub>S level in C2C12 mioblasts according to AzMC fluorescence. Representative LSCM images of control and GSH-DTP-treated cells (scale bar = 10  $\mu$ m). The pre-stained cells were exposed to the compounds for 20 min.

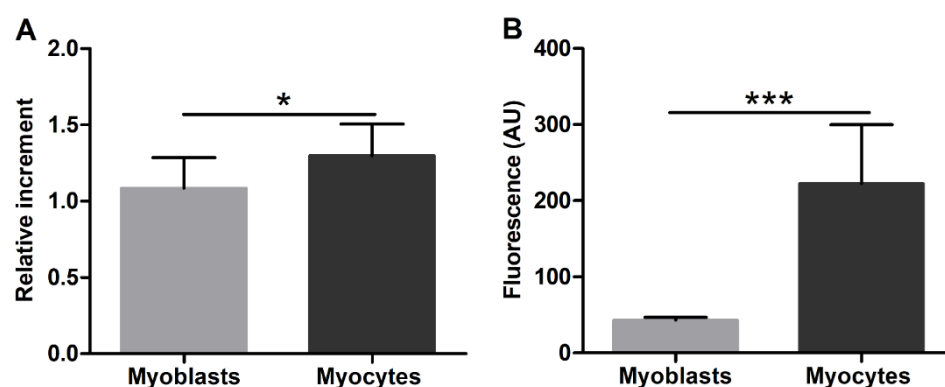

**Figure S2.** Relative GSH (A) and ROS (B) content in C2C12 myoblasts and C2C12 myocytes according MCB microplate assay [Ishkaeva, *et al.*, 2022] and DCFDA fluorescence. Mean  $\pm$  SD are shown (\* $p$  < 0.05, \*\*\* $p$  < 0.001).

**Citation:** Ishkaeva, R.A.; Khaertdinov, N.N.; Yakovlev, A.V.; Esmeteva, M.V.; Salakhieva, D.V.; Nizamov, I.S.; Sitdikova, G.F.; Abdullin, T.I. Characterization of Glutathione Dithiophosphates as Long-Acting H<sub>2</sub>S Donors. *Int. J. Mol. Sci.* **2023**, *24*, 11063. <https://doi.org/10.3390/ijms241311063>

Academic Editor: Sonia Melino

Received: 10 June 2023

Revised: 28 June 2023

Accepted: 30 June 2023

Published: 4 July 2023

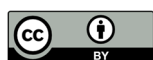

**Copyright:** © 2023 by the authors. Submitted for possible open access publication under the terms and conditions of the Creative Commons Attribution (CC BY) license (<https://creativecommons.org/licenses/by/4.0/>).

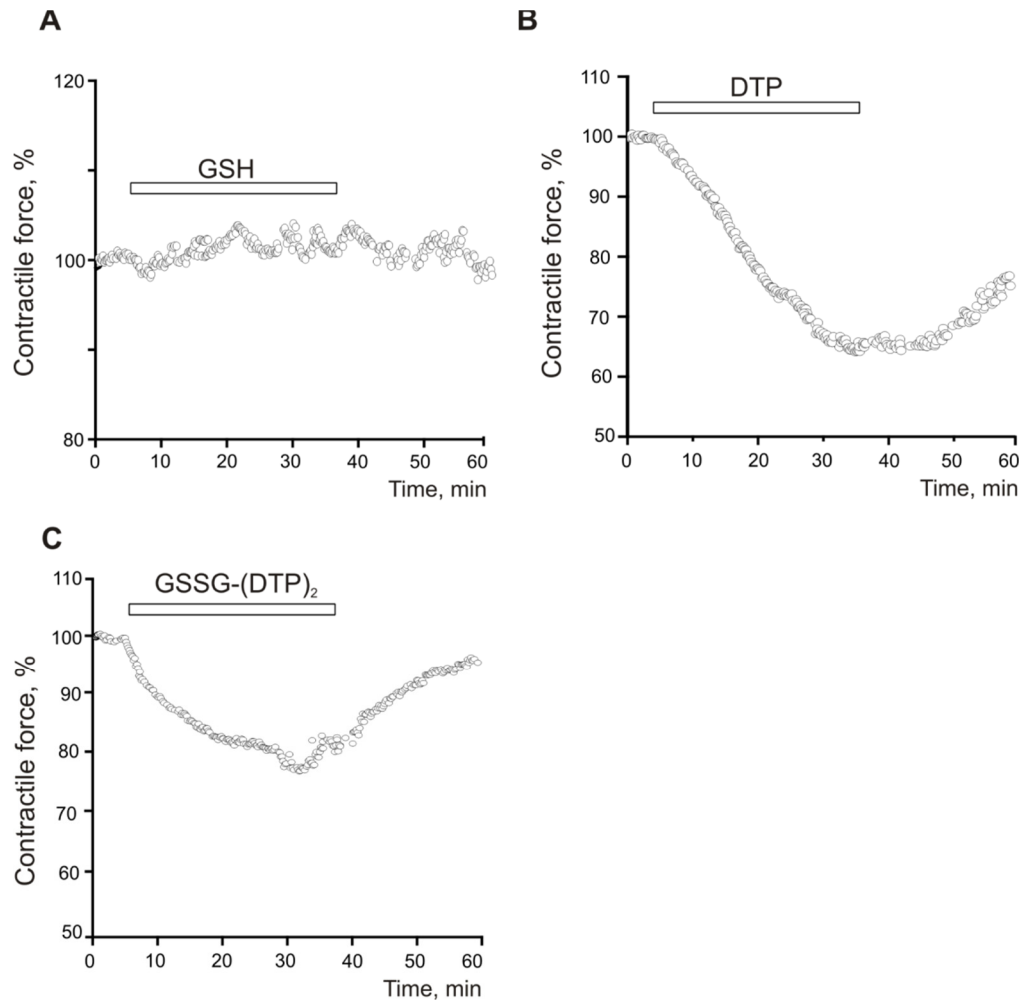

**Figure S3.** Effects of H<sub>2</sub>S donors on the contractile force of rat atrium. The average time courses of negative inotropic action of 200 μM GSH (**A**), 200 μM DTP (**B**) and GSSG-(DTP)<sub>2</sub> (**C**) The time of application is indicated by the bar.
